# Supplementary material
Source: publisher figshare collection journal article supplement (https://geolsoc.figshare.com/ndownloader/files/5424368)
Supplement: Supplementary file 1 [file 5424368]

LA-ICPMS data from sample E1101-293.7
								Corrected isotope ratios															Dates (Ma)											207-corrected		208-corrected			Concentrations (ppm)
		U	Th	Pb*		206Pb		208Pb*	�2s	206Pb*	�2s	207Pb*	�2s	206Pb*	�2s	error	238U	�2s	207Pb*	�2s	error		208Pb*	�2s	207Pb*	�2s	207Pb*	�2s	206Pb*	�2s		%		206Pb*	�2s	206Pb*	�2s
Analysis	Notes	ppm	ppm	ppm	Th/U	204Pb		232Th	(%)	207Pb*	(%)	235U*	(%)	238U	(%)	corr.	206Pb*	(%)	206Pb*	(%)	corr.		232Th	(Ma)	206Pb*	(Ma)	235U	(Ma)	238U*	(Ma)		disc.		238U*	(Ma)	238U*	(Ma)		P	Ti	Y	Zr	Nb	La	Ce	Pr	Nd	Sm	Eu
E1101-293.7 L 152 12/3/2013 1:27:17 PM (Run: 1)		96	59	81.7	0.61	15505.81562		0.159820872	8.436443337	4.199740829	1.384646126	19.97251	4.4	0.60835	4.1	0.95	1.643789408	4.136156385	0.23811	1.4	0		2997	235	3107	22	3090	42	3063	101		1		3090.070863	175.1550305	3067.327149	411.2988095		307	8.38	1315	509678.7967	5.30	1.99	21.31	0.67	5.02	4.90	0.70
E1101-293.7 M 256 12/3/2013 5:17:12 PM (Run: 1)		105	59	86.2		2946.702979		0.181789756	8.858900891	4.215144989	1.910746248	18.95776	4.2	0.57956	3.8	0.89	1.725447019	3.775175351	0.23724	1.9	0		3376	275	3102	30	3040	41	2947	89		5		3039.830047	148.0456985	2922.926271	527.8290485
E1101-293.7 L 151 12/3/2013 1:25:35 PM (Run: 1)		71	46	63.6	0.65	1649.747839		0.167392632	8.7376402	4.261620198	1.342472924	20.53129	4.7	0.63458	4.5	0.96	1.575833071	4.515814869	0.23465	1.3	0		3128	253	3084	21	3117	46	3168	113		-3		3116.641961	203.6901408	3170.127313	261.095496		390	9.68	1252	517806.3522	4.19	5.09	26.04	2.18	12.91	8.01	0.46
E1101-293.7 M 230 12/3/2013 4:22:27 PM (Run: 1)		89	44	69.4		55914.74459		0.182652202	8.649083941	4.649011747	1.857754397	16.90299	4.7	0.56993	4.4	0.92	1.754595447	4.356621355	0.21510	1.9	0		3391	270	2944	30	2929	45	2908	102		1		2929.389247	159.1308821	2883.589522	329.936087
E1101-293.7 L 154 12/3/2013 1:30:40 PM (Run: 1)		35	24	23.5	0.68	1582.831721		0.136276727	9.253001706	4.767144476	2.534934629	14.06001	5.0	0.48612	4.3	0.86	2.057109134	4.333343275	0.20977	2.5	-3.23423E-16		2582	224	2904	41	2754	48	2554	91		12		2754.198367	125.9563005	2551.74812	1015.098015		169	3.10	917	509856.7794	2.08		5.90	0.14	2.93	7.62	2.77
E1101-293.7 L 187 12/3/2013 2:40:54 PM (Run: 1)		272	125	192.5	0.46	369075.302		0.15071369	8.338330646	4.943523159	1.040448394	14.81374	4.1	0.53113	3.9	0.97	1.882781404	3.938948777	0.20228	1.0	0		2837	221	2845	17	2803	39	2746	88		3		2803.471058	127.1602914	2741.897751	434.1805696		264	2.31	705	434187.896	1.93		9.83	0.09	0.86	2.20	0.40
E1101-293.7 M 234 12/3/2013 4:29:14 PM (Run: 1)		189	83	119.4	0.44	4357.796354		0.180260328	8.905358544	5.388308555	4.234487228	11.96185	8.3	0.46747	7.1	0.86	2.139195769	7.120959104	0.18559	4.2	-2.35641E-16		3350	275	2703	70	2601	78	2472	146		9		2601.742921	192.3950669	2429.880157	682.4199882		894	6.74	2459	404377.6122	15.17		15.74	0.09	2.53	8.70	2.28
E1101-293.7 M 239 12/3/2013 4:37:43 PM (Run: 1)		79	39	54.7	0.49	2916.320713		0.17221826	9.084449838	5.562840982	1.933104178	12.73053	5.1	0.51362	4.8	0.93	1.946964488	4.762555838	0.17976	1.9	-1.92946E-16		3212	270	2651	32	2660	48	2672	104		-1		2659.89073	143.7850818	2643.86513	353.5300826		194	11.41	410	404803.8939	1.12		6.79		1.18	1.97	0.50
E1101-293.7 M 211 12/3/2013 3:39:31 PM (Run: 1)		150	98	108.1	0.66	2592.127896		0.176863956	8.627712505	5.58999915	1.592304728	12.66500	4.4	0.51347	4.1	0.93	1.947531045	4.060004283	0.17889	1.6	-2.74775E-16		3292	262	2643	26	2655	41	2671	89		-1		2655.022485	122.4010141	2627.300372	557.46295		181	9.84	362	399252.0831	1.22		19.59	0.12	1.52	3.83	0.75
E1101-293.7 M 238 12/3/2013 4:36:01 PM (Run: 1)		46	184	58.0	3.98	2754.325647		0.169372821	8.332920049	5.949616976	2.966931286	11.46606	5.9	0.49477	5.1	0.86	2.021147318	5.073013894	0.16808	3.0	0		3163	244	2539	50	2562	55	2591	108		-2		2561.74481	145.1507122	2184.384445	5862.466422		185	19.49	340	412646.6783	1.94		23.23	0.11	2.31	3.80	0.78
E1101-293.7 L 199 12/3/2013 3:08:21 PM (Run: 1)		31	43	22.9	1.39	3376.728446		0.130843715	8.863765413	6.006671581	2.026912578	10.91731	4.5	0.47561	4.0	0.89	2.102577034	4.007466653	0.16648	2.0	2.18688E-16		2485	207	2523	34	2516	42	2508	83		1		2516.132288	108.9543139	2511.869359	1088.518163		217	10.24	648	510553.1748	2.70	0.14	34.83	0.04	1.31	2.61	0.45
E1101-293.7 M 253 12/3/2013 5:12:07 PM (Run: 1)		189	119	121.6	0.63	1873.174624		0.150718171	11.07186082	6.066461545	2.213685302	10.69081	5.2	0.47038	4.7	0.90	2.125960425	4.665463676	0.16484	2.2	-3.43993E-16		2838	293	2506	37	2497	48	2485	96		1		2496.658348	124.9634797	2460.536553	603.6678671		216	12.83	768	414495.663	5.21	0.02	8.36	0.15	2.68	4.81	0.64
E1101-293.7 M 258 12/3/2013 5:20:36 PM (Run: 1)		122	103	74.9	0.85	2113.057506		0.142626495	10.95258235	6.20435492	2.472155617	9.44942	5.4	0.42521	4.8	0.89	2.351795621	4.783726768	0.16118	2.5	-1.50206E-16		2695	276	2468	42	2383	49	2284	92		7		2382.938394	113.5360552	2242.555765	804.9117205		206	7.40	714	407257.0365	2.77	0.11	28.34	0.18	2.79	5.17	2.00
E1101-293.7 M 268 12/3/2013 5:41:11 PM (Run: 1)		136	175	98.3	1.29	2007.314175		0.149208381	8.757336543	6.52606642	2.126344973	9.70934	4.8	0.45956	4.3	0.90	2.17600568	4.288286101	0.15323	2.1	1.94811E-16		2811	230	2382	36	2408	44	2438	87		-2		2407.50248	111.122037	2379.193112	#VALUE!		210	6.65	448	409196.271	1.25		20.89	0.03	0.68	1.99	0.22
E1101-293.7 L 162 12/3/2013 1:47:52 PM (Run: 1)		78	80	42.4	1.03	5583.781582		0.113236086	8.368622091	7.753267069	1.82412037	6.78147	4.7	0.38134	4.3	0.92	2.622362173	4.29887719	0.12898	1.8	4.53056E-16		2168	172	2084	32	2083	41	2083	77		0		2083.310452	90.00736511	2071.402167	1031.167979		191	13.69	555	479668.0834	1.06		20.69	0.06	1.71	4.18	0.54
E1101-293.7 L 179 12/3/2013 2:23:42 PM (Run: 1)		234	6	102.4	0.02	4246.530972		0.154669851	9.994290908	7.788572656	1.610096073	6.81828	4.7	0.38515	4.4	0.94	2.596382854	4.427593749	0.12839	1.6	2.49179E-16		2907	271	2076	28	2088	42	2100	79		-1		2088.051859	93.67049459	2098.023955	82.92325803		71	1.27	122	390689.2025	1.46		1.93		0.07	0.26	0.04
E1101-293.7 M 215 12/3/2013 3:46:17 PM (Run: 1)		27	8	13.0	0.29	667.6632958		0.167221678	14.75676914	7.859104854	5.393415456	6.68234	7.5	0.38089	5.2	0.69	2.625424053	5.196292193	0.12724	5.4	2.53532E-16		3125	427	2060	95	2070	66	2080	92		-1		2070.249635	109.7090826	2044.26341	300.6669177		82	3.02	82	391060.8616	0.26		0.81		0.07	0.20	0.08
E1101-293.7 M 229 12/3/2013 4:13:39 PM (Run: 1)		49	48	22.9		1994.524388		0.122294425	10.20392442	8.411541884	4.232042059	5.07167	5.8	0.30940	4.0	0.69	3.232021922	4.000385311	0.11888	4.2	2.0985E-16		2332	225	1940	76	1831	49	1738	61		10		1831.823449	67.97679921	1657.540487	980.2758621
E1101-293.7 L 167 12/3/2013 1:56:21 PM (Run: 1)		241	158	103.8	0.66	6467.552524		0.11191416	8.32794232	8.813850011	1.320469545	5.02846	4.6	0.32144	4.4	0.96	3.111005948	4.421662514	0.11346	1.3	6.0848E-16		2144	169	1856	24	1824	39	1797	69		3		1824.25788	77.67212848	1767.568676	559.5645924		712	7.25	1716	446305.9355	3.77		8.90	0.03	1.59	6.37	0.37
E1101-293.7 L 170 12/3/2013 2:08:26 PM (Run: 1)		79	66	33.9		2493.571345		0.112476234	8.784887473	8.845699331	2.047226792	4.68527	4.8	0.30058	4.3	0.90	3.326859114	4.297801154	0.11305	2.0	-2.01891E-16		2154	180	1849	37	1765	40	1694	64		8		1764.966071	70.54006688	1642.602953	771.6986767
E1101-293.7 M 262 12/3/2013 5:31:00 PM (Run: 1)		72	72	35.0		2524.872737		0.115510378	8.688636111	8.853649822	2.974045562	5.20763	4.8	0.33440	3.8	0.78	2.990463046	3.763903784	0.11295	3.0	0		2209	182	1847	54	1854	41	1860	61		-1		1853.83883	69.21738314	1812.98459	981.7564814
E1101-293.7 L 156 12/3/2013 1:34:04 PM (Run: 1)		159	101	69.2	0.63	7010.312024		0.097709059	9.044148165	8.892757443	2.155413201	5.19914	4.3	0.33533	3.7	0.86	2.982176698	3.663493964	0.11245	2.2	0		1884	163	1839	39	1852	36	1864	59		-1		1852.420679	67.42704705	1862.552813	658.9986615		157	8.30	889	514557.5373	0.60		4.16	0.08	1.96	4.49	0.35
E1101-293.7 M 237 12/3/2013 4:34:19 PM (Run: 1)		142	264	85.8	1.85	10399.21843		0.12119702	9.493790912	8.959450275	1.802902353	5.23347	5.1	0.34007	4.8	0.94	2.940561006	4.764922378	0.11161	1.8	2.06777E-16		2312	207	1826	33	1858	43	1887	78		-3		1857.947676	88.8820796	1769.348271	2345.163114		297	5.22	1398	405752.8877	4.19	0.05	56.76	0.42	7.06	11.49	2.38
E1101-293.7 M 213 12/3/2013 3:42:53 PM (Run: 1)		91	62	42.0	0.68	2072.190761		0.131003757	9.293580327	8.987985699	2.791307323	5.12430	6.1	0.33404	5.4	0.89	2.993670481	5.371877895	0.11126	2.8	0		2488	218	1820	51	1840	51	1858	87		-2		1840.058926	98.47716148	1803.307972	1222.64459		197	10.23	799	395691.3432	0.99		4.78	0.07	1.07	3.96	0.63
E1101-293.7 L 192 12/3/2013 2:56:29 PM (Run: 1)		67	266	47.6	3.94	11726.7925		0.091422355	8.234946141	9.010324413	1.751666852	4.76476	4.5	0.31137	4.2	0.92	3.211587631	4.197715909	0.11098	1.8	2.41583E-16		1768	139	1816	32	1779	38	1747	64		4		1778.866612	71.51514963	1729.433752	3918.149575		360	13.99	1855	509255.7303	1.55	0.09	13.26	0.84	12.46	19.88	2.94
E1101-293.7 L 189 12/3/2013 2:44:18 PM (Run: 1)		98	108	45.7	1.11	30776.38296		0.100032981	8.301661524	9.041070562	2.047711257	4.90018	4.3	0.32131	3.8	0.88	3.112212779	3.801486147	0.11061	2.0	0		1927	153	1809	37	1802	36	1796	60		1		1802.317737	66.97880447	1776.634259	1009.291053		358	32.82	1926	478345.9744	2.39	0.16	9.87	0.78	11.55	19.03	3.24
E1101-293.7 M 244 12/3/2013 4:49:49 PM (Run: 1)		191	172	86.2	0.90	4331.65712		0.111530623	8.547448578	9.050482533	1.660238829	4.80878	4.5	0.31565	4.2	0.93	3.16807003	4.174880279	0.11049	1.7	-5.12561E-16		2137	173	1808	30	1786	38	1768	65		2		1786.523816	72.14773342	1724.470182	1570.328367		265	5.39	673	415234.999	3.13	0.11	25.65	0.08	0.87	2.96	0.64
E1101-293.7 L 165 12/3/2013 1:52:58 PM (Run: 1)		147	202	72.2	1.38	2789.490425		0.104204385	8.170435845	9.076914362	1.962550891	4.76688	4.9	0.31381	4.5	0.92	3.186608152	4.455996615	0.11017	2.0	2.03125E-16		2004	156	1802	36	1779	41	1759	69		2		1779.182436	76.58235408	1711.714976	2758.425562		117	20.04	362	452673.4035	1.64	0.01	55.96	0.30	5.93	6.89	2.97
E1101-293.7 M 226 12/3/2013 4:08:34 PM (Run: 1)		165	157	73.2	0.95	3770.162374		0.106261955	8.522651168	9.100541096	2.290137602	4.67725	4.9	0.30871	4.4	0.89	3.239243359	4.377688525	0.10988	2.3	1.77184E-16		2041	165	1797	42	1763	41	1734	67		4		1763.324171	74.04002085	1695.149376	1253.146679		791	12.37	1877	416233.9654	1.15		7.32	0.24	5.41	11.57	0.76
E1101-293.7 L 177 12/3/2013 2:20:18 PM (Run: 1)		283	86	105.0	0.30	27097.1262		0.121503706	12.62051301	9.13882061	1.796556783	4.54932	7.3	0.30153	7.1	0.97	3.316382099	7.053809363	0.10942	1.8	2.80347E-16		2318	276	1790	33	1740	61	1699	105		5		1740.248326	116.2939846	1675.272438	352.686275		818	3.69	921	390527.874	6.19	34.63	84.86	11.24	62.84	20.03	0.75
E1101-293.7 M 223 12/3/2013 4:03:28 PM (Run: 1)		83	138	46.5	1.67	1630.761893		0.117601601	9.118201051	9.147060744	2.861255417	4.94513	5.5	0.32806	4.7	0.85	3.048191114	4.701380988	0.10932	2.9	-1.32053E-16		2247	194	1788	52	1810	46	1829	75		-2		1809.900957	84.74946735	1726.64209	3446.510885		314	13.67	1133	426853.0051	1.84	0.06	9.64	0.30	4.53	8.69	1.54
E1101-293.7 L 166 12/3/2013 1:54:39 PM (Run: 1)		131	152	59.3	1.16	1623.872644		0.097522101	8.549015619	9.172100445	1.593575067	4.61158	4.6	0.30677	4.3	0.94	3.259737287	4.316099207	0.10903	1.6	0		1881	154	1783	29	1751	38	1725	65		3		1751.501015	72.49009045	1699.86067	1965.451464		442	10.37	1387	455245.347	1.60		9.46	0.17	2.83	6.40	1.11
E1101-293.7 L 206 12/3/2013 3:23:54 PM (Run: 1)		150	44	57.7	0.29	10213.24733		0.122686526	8.616891848	9.214314513	2.078468621	4.69411	5.5	0.31370	5.0	0.92	3.187757603	5.040556315	0.10853	2.1	-1.69554E-16		2339	190	1775	38	1766	46	1759	78		1		1766.226272	86.67524829	1737.772135	457.3042476		144	6.88	390	382305.5759	1.36		5.77	0.03	0.95	1.81
E1101-293.7 L 200 12/3/2013 3:13:41 PM (Run: 1)		114	68	47.7	0.60	1399.196613		0.092112485	8.72092079	9.22908659	1.50192044	4.88688	4.2	0.32711	4.0	0.94	3.057106354	3.968882943	0.10835	1.5	2.97999E-16		1781	149	1772	27	1800	36	1824	63		-3		1799.877169	71.24623261	1827.587515	671.3245702		363	17.64	955	521211.0805	1.02		5.81	0.03	1.24	2.32	0.14
E1101-293.7 M 252 12/3/2013 5:10:25 PM (Run: 1)		115	75	44.2	0.65	1113.447178		0.079948324	10.04321298	9.234861173	2.241770122	4.47519	4.7	0.29974	4.1	0.88	3.336259337	4.13782549	0.10829	2.2	1.91499E-16		1555	150	1771	41	1726	39	1690	62		5		1726.569974	67.9825414	1701.304731	722.5028561		272	10.28	654	417712.498	1.62		4.61	0.09	1.11	2.62	0.25
E1101-293.7 L 193 12/3/2013 2:58:11 PM (Run: 1)		43	101	24.4	2.37	1546.888633		0.094946626	8.526330313	9.312509766	3.661806998	4.65717	5.2	0.31455	3.6	0.71	3.17916089	3.642728912	0.10738	3.7	-1.3317E-16		1833	149	1755	67	1760	43	1763	56		0		1759.56371	63.26221569	1735.780224	5449.779751		281	10.58	650	497028.7757	1.22		11.95	0.09	1.00	2.86	0.33
E1101-293.7 L 159 12/3/2013 1:39:09 PM (Run: 1)		133	142	56.1	1.07	1937.447833		0.084289652	8.422766767	9.536469957	1.6749601	4.33847	4.6	0.30007	4.3	0.93	3.332554059	4.337044627	0.10486	1.7	-4.8906E-16		1636	132	1712	31	1701	38	1692	65		1		1700.752586	71.44095935	1699.811113	1000.737907		232	7.56	981	526468.6768	1.42		12.02	0.02	1.04	3.43	0.56
E1101-293.7 L 157 12/3/2013 1:35:46 PM (Run: 1)		254	298	115.1	1.18	4595.219508		0.088760223	8.978883694	9.583955432	1.35642162	4.54907	4.9	0.31620	4.7	0.96	3.162523189	4.740159523	0.10434	1.4	0		1719	148	1703	25	1740	41	1771	73		-4		1739.830492	82.36312661	1779.517109	933.8010825		222	7.34	610	500707.4719	5.33		27.65	0.08	0.84	3.00	0.33
E1101-293.7 M 255 12/3/2013 5:15:30 PM (Run: 1)		218	133	85.0	0.61	4993.293405		0.095667623	9.186502559	9.613885142	1.737756062	4.30941	3.7	0.30048	3.3	0.88	3.328009175	3.295462263	0.10402	1.7	1.55094E-16		1847	162	1697	32	1695	31	1694	49		0		1695.170343	54.44531499	1681.698076	1114.054995		234	4.44	841	421929.2853	4.37	0.16	14.85	0.10	1.43	3.01	0.31
E1101-293.7 L 205 12/3/2013 3:22:12 PM (Run: 1)		483	367	187.2	0.76	7846.808179		0.114686208	8.206436133	9.69273574	1.719784105	3.87501	4.1	0.27241	3.8	0.91	3.670984105	3.770058712	0.10317	1.7	-2.73973E-16		2194	171	1682	32	1608	33	1553	52		8		1608.807627	56.40020319	1486.131365	1389.777652		364	4.98	1087	364841.0573	19.85	0.04	39.37	0.11	1.22	3.47	0.19
E1101-293.7 M 269 12/3/2013 5:42:53 PM (Run: 1)		85	34	31.1	0.40	500.7775733		0.100803717	9.726375772	9.843176912	2.060188659	4.13168	4.7	0.29496	4.2	0.90	3.39030955	4.215943469	0.10159	2.1	0		1941	180	1653	38	1661	38	1666	62		-1		1660.559733	68.464042	1652.256184	#VALUE!		214	12.23	478	422869.9009	3.84		17.16	0.02	0.86	2.01	0.43
E1101-293.7 M 245 12/3/2013 4:51:31 PM (Run: 1)		203	215	79.8		3571.32934		0.086842679	12.28759046	9.888021225	2.074966495	3.81439	5.6	0.27355	5.2	0.93	3.655666719	5.239115239	0.10113	2.1	3.26807E-16		1683	198	1645	38	1596	45	1559	73		5		1596.000252	78.82579409	1540.208952	2035.758007
E1101-293.7 M 212 12/3/2013 3:41:12 PM (Run: 1)		235	112	72.1	0.47	13245.31563		0.071389888	9.056950448	9.95616695	2.029516719	3.42794	8.0	0.24753	7.8	0.97	4.039954344	7.78462669	0.10044	2.0	4.49738E-16		1394	122	1632	38	1511	63	1426	100		13		1511.34977	105.9410073	1427.715158	490.8079056		151	7.29	348	408374.4784	2.50	0.05	12.31	0.15	1.13	2.19	0.44
E1101-293.7 M 219 12/3/2013 3:53:04 PM (Run: 1)		110	101	48.4	0.92	3712.851727		0.114149057	9.124005408	9.973335014	2.658155772	4.21703	5.5	0.30503	4.8	0.87	3.27834405	4.795757975	0.10027	2.7	-1.39345E-16		2185	189	1629	49	1677	45	1716	72		-5		1677.12759	80.69973338	1657.875289	1045.243001		301	12.01	786	421076.1275	2.21	0.16	20.63	0.11	1.40	3.28	0.79
E1101-293.7 L 172 12/3/2013 2:11:50 PM (Run: 1)		92	88	36.9	0.95	2853.282102		0.10312116	9.066117795	10.02891148	2.496422488	3.77040	6.0	0.27425	5.4	0.91	3.646363059	5.401713882	0.09971	2.5	-2.63457E-16		1984	171	1619	46	1586	48	1562	75		3		1586.606526	81.61936292	1506.171376	788.2144513		205	12.98	1001	422076.4433	0.72		14.80	0.15	4.15	7.60	1.32
E1101-293.7 L 208 12/3/2013 3:27:17 PM (Run: 1)		64	36	22.0	0.56	1475.124594		0.110355099	9.771297852	10.40261801	2.585417868	3.38318	4.6	0.25525	3.8	0.82	3.917723448	3.765156399	0.09613	2.6	-1.8248E-16		2116	196	1550	49	1501	36	1465	49		5		1500.726403	53.21441106	1415.741433	325.957411		222	12.76	461	368848.068	0.43		9.72	0.05	1.49	1.78	0.51
E1101-293.7 L 181 12/3/2013 2:30:44 PM (Run: 1)		140	117	50.8	0.84	5869.29906		0.101188103	8.698782536	10.59320312	2.079935434	3.32050	4.9	0.25511	4.5	0.91	3.919855842	4.468127185	0.09440	2.1	-1.91141E-16		1948	162	1516	39	1486	38	1465	59		3		1486.017145	63.1275287	1408.150692	1087.212499		272	14.42	688	396786.8605	1.71		31.29	0.10	2.18	5.98	1.60
E1101-293.7 L 169 12/3/2013 1:59:44 PM (Run: 1)		69	56	23.6	0.81	2392.052782		0.08957249	8.767148809	10.69696703	2.931901969	3.17810	5.5	0.24656	4.6	0.84	4.055768189	4.623327532	0.09348	2.9	0		1734	146	1498	55	1452	42	1421	59		5		1452.055536	63.27447793	1385.320551	867.1646473		260	18.67	644	413473.9292	2.63	0.05	12.73	0.05	0.82	2.14	0.31
E1101-293.7 L 195 12/3/2013 3:01:35 PM (Run: 1)		79	68	27.5	0.86	1717.760946		0.075751459	8.679755662	10.73881336	2.598606722	3.31026	4.7	0.25782	3.9	0.83	3.878669222	3.903205401	0.09312	2.6	1.75133E-16		1476	124	1490	49	1483	37	1479	52		1		1483.50365	55.87873855	1479.010627	833.2119688		251	9.27	897	498663.9092	3.25		27.13	0.03	0.77	3.24	0.62
E1101-293.7 M 228 12/3/2013 4:11:57 PM (Run: 1)		49	38	17.5	0.78	435.4402984		0.089900247	9.309977536	10.80282954	3.336768288	3.35327	6.2	0.26273	5.3	0.84	3.806236697	5.269457016	0.09257	3.3	0		1740	155	1479	63	1494	49	1504	71		-2		1493.488862	76.89153751	1478.488656	898.0133498		218	10.02	640	426965.3212	1.12		11.20	0.02	0.56	1.81	0.53
E1101-293.7 M 263 12/3/2013 5:32:42 PM (Run: 1)		84	43	27.9	0.51	3547.388304		0.092011787	10.59008506	10.83497077	2.900514652	3.33817	5.2	0.26232	4.3	0.83	3.812109947	4.342973396	0.09229	2.9	-1.41016E-16		1779	180	1473	55	1490	41	1502	58		-2		1489.951653	63.3091339	1483.04373	965.3043889		159	6.18	537	421327.9409	5.80		8.76	0.03	0.76	1.79	0.12
E1101-293.7 M 218 12/3/2013 3:51:22 PM (Run: 1)		231	109	72.0	0.47	7738.760931		0.09145261	8.762587671	10.84745635	1.556429366	3.12100	5.5	0.24554	5.2	0.96	4.072672708	5.238427718	0.09219	1.6	4.35742E-16		1769	148	1471	30	1438	42	1415	67		4		1438.028474	71.36623648	1393.18649	443.7488534		227	15.15	582	390364.3604	3.46		16.34	0.03	0.87	1.90	0.27
E1101-293.7 M 216 12/3/2013 3:47:59 PM (Run: 1)		109	86	40.2	0.79	3284.131459		0.100543264	8.960873061	10.87248118	2.840511636	3.34920	5.1	0.26410	4.2	0.83	3.786441431	4.230286464	0.09198	2.8	2.95661E-16		1936	165	1467	54	1493	40	1511	57		-3		1492.490068	62.10422789	1464.603003	940.0308486		258	5.86	714	416895.4963	1.40	0.08	18.28	0.05	0.76	2.69	0.85
E1101-293.7 L 173 12/3/2013 2:13:32 PM (Run: 1)		88	56	27.4	0.63	3771.459576		0.090493505	8.724188253	10.88822452	3.06093583	2.93245	5.3	0.23157	4.3	0.82	4.318311147	4.316032402	0.09184	3.1	0		1751	146	1464	58	1390	40	1343	52		8		1390.652581	55.64261451	1306.874533	1254.95855		236	2.66	2726	418642.3899	4.50	0.76	12.16	0.49	8.58	17.66	2.80
E1101-293.7 L 194 12/3/2013 2:59:53 PM (Run: 1)		105	78	33.4	0.75	2468.426364		0.070435073	8.993111289	10.96116344	1.944812987	3.08127	4.3	0.24495	3.8	0.89	4.082388597	3.816055431	0.09123	1.9	0		1376	120	1451	37	1428	33	1412	48		3		1428.148419	51.9728279	1416.162011	1485.866245		404	24.09	1566	503711.8897	4.29	1.07	28.46	0.46	4.69	7.21	0.62
E1101-293.7 M 250 12/3/2013 5:07:02 PM (Run: 1)		159	187	59.9	1.17	909.2398478		0.088474985	8.800720587	10.9641901	2.124069106	3.13665	4.4	0.24943	3.8	0.88	4.009210912	3.841831413	0.09121	2.1	0		1714	145	1451	40	1442	34	1436	49		1		1441.769086	53.28610977	1387.623009	1646.589562		283	11.12	1477	420019.4081	1.40		14.38	0.28	4.37	7.93	1.40
E1101-293.7 L 202 12/3/2013 3:17:04 PM (Run: 1)		166	145	57.5	0.87	3121.225265		0.077779389	8.582441114	10.98059398	2.080689771	3.21222	4.3	0.25582	3.8	0.88	3.909034971	3.807462521	0.09107	2.1	0		1514	125	1448	40	1460	34	1468	50		-1		1460.057539	54.15824931	1462.886152	985.9534941		347	8.24	1365	500871.4023	2.66		33.74	0.07	1.27	4.29	0.73
E1101-293.7 M 231 12/3/2013 4:24:09 PM (Run: 1)		192	136	65.6	0.70	30906.84926		0.090226896	8.681225979	10.98492745	2.625909723	3.19160	5.1	0.25428	4.3	0.86	3.932742253	4.346636642	0.09103	2.6	0		1746	145	1447	50	1455	39	1460	57		-1		1455.092916	61.48278482	1432.958645	438.9525333		201	8.88	700	413795.5614	5.48		32.24	0.03	0.65	2.78	0.41
E1101-293.7 M 243 12/3/2013 4:48:07 PM (Run: 1)		26	20	9.2	0.76	482.5580371		0.092900592	10.54311586	10.99099788	4.02133402	3.23051	5.8	0.25752	4.2	0.72	3.883235439	4.226938471	0.09098	4.0	0		1796	181	1446	77	1465	45	1477	56		-2		1464.426787	60.73201148	1443.933744	1480.142468		210	15.42	524	433295.5535	0.82		11.34	0.04	0.73	1.98	0.65
E1101-293.7 L 180 12/3/2013 2:29:02 PM (Run: 1)		222	96	72.0	0.43	9943.416714		0.100678987	8.697218589	10.99248046	1.916300196	3.23433	4.4	0.25786	4.0	0.90	3.878117038	4.009204062	0.09097	1.9	-2.31211E-16		1939	161	1446	36	1465	34	1479	53		-2		1465.339715	57.46292238	1452.536511	220.0186151		204	6.57	524	397937.035	1.92		13.62	0.04	0.38	1.91	0.18
E1101-293.7 M 264 12/3/2013 5:34:24 PM (Run: 1)		261	188	85.0	0.72	1360.998414		0.086118078	8.8543482	10.99991316	1.834404342	3.03262	5.1	0.24194	4.7	0.93	4.133272767	4.718098758	0.09091	1.8	-2.05243E-16		1670	142	1445	35	1416	39	1397	59		3		1415.995367	63.45828882	1369.4272	1457.012029		258	6.85	796	419826.5138	3.24	0.03	24.31	0.07	1.16	3.11	0.23
E1101-293.7 L 174 12/3/2013 2:15:13 PM (Run: 1)		119	57	39.0	0.48	1047.395675		0.099567326	9.205609951	11.04630105	2.052940144	3.20389	4.5	0.25668	4.0	0.89	3.895894269	4.045321713	0.09053	2.1	-2.13895E-16		1918	168	1437	39	1458	35	1473	53		-3		1458.003682	57.7547056	1444.586829	914.0314074		245	11.17	617	401183.5557	2.49		10.36		0.94	2.72	0.35
E1101-293.7 L 161 12/3/2013 1:46:10 PM (Run: 1)		257	212	83.9	0.82	9318.203906		0.071721202	8.56928433	11.09476927	1.26349192	3.04615	4.5	0.24511	4.3	0.96	4.079735519	4.337098951	0.09013	1.3	-3.24159E-16		1400	116	1428	24	1419	35	1413	55		1		1419.307847	59.12265872	1414.73607	1010.504635		216	11.36	715	477763.3688	3.44	0.01	29.36	0.16	1.60	2.74	0.88
E1101-293.7 M 222 12/3/2013 4:01:46 PM (Run: 1)		101	38	32.0	0.37	1371.045192		0.094271518	8.915085673	11.11080788	3.002738457	3.22012	5.0	0.25949	4.0	0.80	3.853746486	4.015250923	0.09000	3.0	-1.47333E-16		1821	155	1426	57	1462	39	1487	53		-4		1461.84971	58.07573996	1471.004629	314.6201548		198	9.37	582	415110.9587	2.08		5.75	0.03	0.64	2.79	0.32
E1101-293.7 M 248 12/3/2013 4:56:36 PM (Run: 1)		44	28	13.6	0.65	707.8595555		0.086624802	11.16521015	11.14111641	4.120002882	2.91642	6.4	0.23566	4.9	0.76	4.243489208	4.87740217	0.08976	4.1	-3.53593E-16		1679	180	1420	79	1386	48	1364	60		4		1386.330303	64.20104738	1335.92383	633.6960302		138	4.70	478	421265.4996	0.23	0.02	7.17	0.04	0.69	2.24	0.70
E1101-293.7 L 198 12/3/2013 3:06:39 PM (Run: 1)		127	109	42.6	0.86	2274.77681		0.07227078	8.554129411	11.15094272	1.985677966	3.08993	4.1	0.24990	3.6	0.87	4.001663202	3.565167738	0.08968	2.0	0		1410	117	1419	38	1430	31	1438	46		-1		1430.144517	49.62579019	1441.226456	1130.032583		239	12.45	876	506886.9986	3.61		16.07	0.01	0.73	2.52	0.17
E1101-293.7 M 254 12/3/2013 5:13:49 PM (Run: 1)		70	49	23.3	0.70	2097.34109		0.08608912	9.073415796	11.17634357	2.613375863	3.11404	5.0	0.25242	4.3	0.85	3.961661628	4.301522646	0.08947	2.6	-1.58018E-16		1669	145	1414	50	1436	39	1451	56		-3		1436.065089	60.50734121	1430.079116	1364.542997		213	15.01	549	436458.2278	1.78	0.26	10.02	0.08	1.17	2.57	0.24
E1101-293.7 L 155 12/3/2013 1:32:22 PM (Run: 1)		34	22	11.1	0.65	2142.072207		0.073896213	9.848489217	11.18810191	3.725655449	3.11523	5.8	0.25278	4.4	0.76	3.955986485	4.402858282	0.08938	3.7	0		1441	137	1412	71	1436	44	1453	57		-3		1436.34829	62.14318707	1453.835395	827.4500537		232	11.71	819	523200.9283	1.19		9.36	0.04	0.72	3.21	0.44
E1101-293.7 L 196 12/3/2013 3:03:17 PM (Run: 1)		310	268	102.3	0.86	13931.9957		0.072069825	8.317700872	11.23899033	1.402420522	3.01568	3.5	0.24582	3.2	0.92	4.068079302	3.225617421	0.08898	1.4	-1.9634E-16		1407	113	1404	27	1412	27	1417	41		-1		1411.555362	44.17963545	1418.101255	1051.092247		226	11.18	879	505527.4085	4.59		35.37	0.06	1.22	2.81	0.32
E1101-293.7 M 242 12/3/2013 4:46:26 PM (Run: 1)		56	57	21.3	1.02	437.344339		0.092203107	9.561723473	11.2959015	2.546302786	3.19330	5.0	0.26161	4.4	0.86	3.822443855	4.35805299	0.08853	2.5	-1.60077E-16		1783	163	1394	49	1456	39	1498	58		-7		1455.259669	63.57069906	1456.998343	1356.245349		218	16.96	660	412435.008	0.62		15.03	0.11	2.10	3.61	0.94
E1101-293.7 L 184 12/3/2013 2:35:49 PM (Run: 1)		133	124	45.0	0.93	2207.483252		0.089016657	8.697318856	11.30799213	2.136704546	2.87461	4.4	0.23576	3.8	0.87	4.241674871	3.826695924	0.08843	2.1	4.34502E-16		1724	144	1392	41	1375	33	1365	47		2		1375.354172	50.35760694	1316.228867	1979.637944		220	11.71	1785	428238.2834	1.60		12.86	0.45	6.51	9.80	2.41
E1101-293.7 M 214 12/3/2013 3:44:35 PM (Run: 1)		157	148	51.1	0.94	1798.681904		0.085272013	8.993987212	11.32404408	2.262765509	2.73240	6.4	0.22441	6.0	0.93	4.456113184	5.960069478	0.08831	2.3	0		1654	143	1389	43	1337	47	1305	70		6		1337.541824	74.65390994	1257.123328	1966.263653		234	4.54	2900	410506.3106	7.75		136.76	0.16	2.81	5.98	1.37
E1101-293.7 L 197 12/3/2013 3:04:58 PM (Run: 1)		42	39	13.7	0.93	1424.443407		0.07187658	8.951185172	11.32753471	3.363601434	2.92755	5.1	0.24051	3.8	0.75	4.157775101	3.832819921	0.08828	3.4	1.37787E-16		1403	121	1389	65	1389	39	1389	48		0		1389.058956	51.57728767	1387.572649	1113.47337		122	11.31	511	518631.2452	0.41		7.65	0.02	0.91	3.24	0.60
E1101-293.7 M 220 12/3/2013 3:58:23 PM (Run: 1)		202	75	54.9	0.37	3603.015206		0.085946783	8.949362776	11.33960649	2.330124259	2.67713	4.5	0.22017	3.8	0.85	4.541860614	3.815631624	0.08819	2.3	-1.99795E-16		1667	143	1387	45	1322	33	1283	44		7		1322.449996	46.97072832	1263.637499	475.6395167		210	2.14	2004	419227.4167	31.11	0.12	21.78	0.04	1.56	5.31	0.21
E1101-293.7 M 266 12/3/2013 5:37:47 PM (Run: 1)		133	182	45.3		2453.448885		0.073807517	9.323579143	11.35242674	2.385239576	2.67002	5.8	0.21984	5.3	0.91	4.548817767	5.339268416	0.08809	2.4	0		1439	130	1384	46	1320	43	1281	62		7		1320.483016	65.57417875	1247.463304	2143.639866
E1101-293.7 L 201 12/3/2013 3:15:23 PM (Run: 1)		35	26	10.3	0.76	381.4349234		0.064552081	8.994446418	11.35803693	4.02609979	2.78924	5.4	0.22977	3.7	0.67	4.352231192	3.652097766	0.08804	4.0	-1.2081E-16		1264	110	1383	77	1353	41	1333	44		4		1352.796276	47.10426726	1340.572053	849.748361		174	9.55	695	527005.7446	3.25		9.08	0.00	0.94	3.03	0.21
E1101-293.7 M 259 12/3/2013 5:22:17 PM (Run: 1)		162	140	48.0	0.86	8345.044083		0.064293691	13.07928287	11.37076239	2.023202228	2.68017	5.5	0.22103	5.1	0.93	4.524275362	5.061408093	0.08794	2.0	-1.73468E-16		1259	160	1381	39	1323	40	1287	59		7		1323.262697	62.49097997	1290.741432	1046.99406		228	5.24	770	427671.3104	2.20	0.04	28.24	0.08	1.44	1.95	0.61
E1101-293.7 M 236 12/3/2013 4:32:37 PM (Run: 1)		175	119	59.3	0.68	2460.290449		0.089111936	8.834259145	11.37199771	2.130574686	3.09809	4.4	0.25552	3.8	0.87	3.913551579	3.848534989	0.08794	2.1	-2.1664E-16		1725	146	1381	41	1432	34	1467	50		-6		1431.986455	54.86886888	1442.944242	861.5381131		631	9.93	1396	403214.1769	2.23	0.43	19.14	0.32	4.10	5.64	0.83
E1101-293.7 M 221 12/3/2013 4:00:04 PM (Run: 1)		10	6	2.7	0.57	202.2431601		0.073167069	15.24568069	11.39659287	8.130548782	2.45853	9.8	0.20321	5.5	0.56	4.920965712	5.487629985	0.08775	8.1	0		1427	210	1377	156	1260	71	1193	60		13		1260.447815	63.09526954	1173.654571	675.1299765		96	23.72	192	412508.1855	0.20		0.73		0.46	1.16	0.04
E1101-293.7 L 168 12/3/2013 1:58:03 PM (Run: 1)		43	35	13.4	0.80	565.7140618		0.084985424	9.116605353	11.51535796	3.793009244	2.68533	6.4	0.22427	5.2	0.81	4.458882822	5.174805084	0.08684	3.8	1.81002E-16		1649	144	1357	73	1324	47	1304	61		4		1324.571004	65.03065203	1264.946093	1047.793642		192	18.03	475	448872.4469	0.37	0.03	5.11	0.02	1.09	2.71	0.53
E1101-293.7 M 210 12/3/2013 3:37:49 PM (Run: 1)		132	90	42.7	0.68	2832.34709		0.088081126	8.913272408	11.55436356	3.00039077	2.89487	5.7	0.24259	4.9	0.85	4.122176034	4.871425263	0.08655	3.0	2.43067E-16		1706	146	1350	58	1381	43	1400	61		-4		1380.439049	66.107079	1371.491858	860.8994531		394	19.03	1314	413932.3424	1.94	0.14	12.54	0.20	3.33	6.75	1.97
E1101-293.7 M 260 12/3/2013 5:23:59 PM (Run: 1)		65	32	17.3		2071.695677		0.080085552	11.00472059	11.75648454	4.487222368	2.45384	6.3	0.20923	4.4	0.70	4.779442077	4.380005084	0.08506	4.5	3.61525E-16		1557	165	1317	87	1259	45	1225	49		7		1258.814292	51.66647148	1202.276666	666.2197807
E1101-293.7 M 267 12/3/2013 5:39:29 PM (Run: 1)		145	121	44.3	0.84	6531.480353		0.079199015	9.198172214	11.83907715	1.51924576	2.57219	4.2	0.22086	3.9	0.93	4.527724205	3.872153738	0.08447	1.5	0		1541	136	1303	30	1293	30	1286	45		1		1292.812355	47.98256421	1255.813654	#VALUE!		221	17.02	771	423430.0995	1.20		17.67	0.15	2.93	5.44	1.53
E1101-293.7 L 207 12/3/2013 3:25:35 PM (Run: 1)		105	169	39.1		178384.1922		0.087577184	8.629537245	11.86891709	2.710890574	2.48414	5.3	0.21384	4.6	0.86	4.676429567	4.552388679	0.08425	2.7	-1.43939E-16		1697	140	1298	53	1267	38	1249	52		4		1267.561066	54.72242067	1129.842522	2386.318132
E1101-293.7 L 171 12/3/2013 2:10:08 PM (Run: 1)		112	174	37.2	1.56	11793.10632		0.076069573	8.73212345	11.88018738	2.421658315	2.29966	5.4	0.19815	4.8	0.89	5.04678622	4.830554858	0.08417	2.4	0		1482	125	1297	47	1212	38	1165	51		10		1212.556664	53.87266418	1083.815926	2466.681309		244	13.56	861	421262.5257	1.86		35.81	0.12	2.39	5.13	2.38
E1101-293.7 M 246 12/3/2013 4:53:13 PM (Run: 1)		62	84	22.6	1.36	482.9532027		0.083808063	8.790335813	11.91853589	3.487489002	2.67539	5.4	0.23126	4.2	0.77	4.32405852	4.179208481	0.08390	3.5	-1.21877E-16		1627	137	1290	68	1322	40	1341	51		-4		1321.539981	54.36119329	1281.14351	1771.220697		275	19.10	1344	417064.1141	0.60	0.07	11.95	0.44	6.28	10.57	3.24
E1101-293.7 M 217 12/3/2013 3:49:41 PM (Run: 1)		52	53	15.8	1.01	731.775679		0.073353792	14.16524341	11.99804143	3.380790778	2.41571	6.3	0.21021	5.4	0.85	4.757150448	5.374537259	0.08335	3.4	1.95524E-16		1431	196	1277	66	1247	46	1230	60		4		1247.4151	63.61987042	1199.729689	1293.015246		250	12.26	631	407287.4212	1.55	0.06	11.68	0.07	1.30	3.37	0.61
E1101-293.7 M 247 12/3/2013 4:54:54 PM (Run: 1)		59	60	17.3	1.03	784.1342937		0.075507588	9.111802247	12.13221296	2.707388782	2.28691	4.9	0.20123	4.1	0.83	4.96950382	4.106913912	0.08243	2.7	1.59759E-16		1471	129	1256	53	1208	35	1182	44		6		1208.462717	46.64983123	1136.775363	1399.142842		250	18.71	1039	422960.0813	2.13	0.03	8.33	0.24	4.20	8.25	0.63
E1101-293.7 L 191 12/3/2013 2:54:48 PM (Run: 1)		88	47	22.6	0.53	1889.921908		0.062351581	8.888754742	12.17448194	2.240566724	2.32596	4.4	0.20538	3.8	0.86	4.86910693	3.813252723	0.08214	2.2	0		1223	105	1249	44	1220	31	1204	42		4		1220.371733	44.18411531	1202.796043	632.1499527		200	13.93	629	492290.8587	1.98		5.90	0.01	0.58	1.83	0.25
E1101-293.7 L 188 12/3/2013 2:42:36 PM (Run: 1)		463	20	106.3	0.04	4327.905651		0.067374105	23.16665289	12.18773052	1.699573242	2.37017	4.0	0.20951	3.6	0.90	4.773076237	3.594054644	0.08205	1.7	1.45404E-16		1318	296	1247	33	1234	28	1226	40		2		1233.712556	42.44330821	1225.681175	66.74380365		112	3.55	254	439021.1042	4.42	0.02	1.51	0.01	0.16	0.34	0.26
E1101-293.7 M 233 12/3/2013 4:27:33 PM (Run: 1)		79	90	24.2		667.4793523		0.073412992	8.969351703	12.18841232	3.224742162	2.31983	5.0	0.20507	3.8	0.76	4.876389364	3.755592198	0.08205	3.2	-1.46675E-16		1432	124	1247	63	1218	35	1202	41		4		1218.497541	43.53837337	1162.504766	2551.626318
E1101-293.7 L 178 12/3/2013 2:22:00 PM (Run: 1)		24	50	9.5	2.06	2035.647886		0.082930817	9.391314087	12.31507269	4.1707352	2.27674	6.4	0.20335	4.8	0.76	4.917581586	4.806657013	0.08120	4.2	-1.77217E-16		1610	145	1226	82	1205	45	1193	52		3		1205.200201	55.33284757	1038.592775	3617.594213		222	31.76	444	392137.7627	0.71		20.32	0.11	2.37	3.94	1.37
E1101-293.7 M 249 12/3/2013 4:58:18 PM (Run: 1)		67	61	19.4	0.90	906.8904434		0.074495	8.936837459	12.31678841	3.002547944	2.28311	5.4	0.20395	4.5	0.83	4.903178292	4.524994112	0.08119	3.0	0		1452	125	1226	59	1207	38	1197	49		2		1207.162168	52.16522454	1162.58926	621.781448		184	13.44	641	426932.4862	1.66		4.86	0.13	2.82	5.37	0.41
E1101-293.7 L 160 12/3/2013 1:44:29 PM (Run: 1)		141	56	36.6	0.40	2923.7877		0.065987025	9.016380613	12.32985086	1.904600388	2.41597	4.6	0.21605	4.2	0.91	4.628631673	4.190984613	0.08110	1.9	2.22541E-16		1292	113	1224	37	1247	33	1261	48		-3		1247.252004	51.06245161	1259.316054	366.4805144		134	45.16	209	492707.299	16.60		24.74	0.16	2.94	6.22	2.32
E1101-293.7 M 227 12/3/2013 4:10:16 PM (Run: 1)		63	39	16.8	0.62	795.7418195		0.077683904	8.832746773	12.36851911	4.004020064	2.25594	6.4	0.20237	5.0	0.78	4.941470583	4.979399331	0.08085	4.0	0		1512	129	1218	79	1199	45	1188	54		2		1198.725938	57.04985037	1159.573221	318.3603191		232	14.11	607	427747.4074	1.55		7.55	0.10	0.90	3.57	0.48
E1101-293.7 L 186 12/3/2013 2:39:12 PM (Run: 1)		47	28	13.1	0.59	1725.235424		0.084414737	9.769943343	12.44555551	2.710464364	2.36011	5.7	0.21303	5.0	0.88	4.694122504	5.049902282	0.08035	2.7	0		1638	154	1206	53	1231	41	1245	57		-3		1230.504945	60.77245048	1212.098939	840.397946		208	13.30	415	432795.6306	1.47	0.60	7.42	0.24	2.06	2.27	0.20
E1101-293.7 M 235 12/3/2013 4:30:56 PM (Run: 1)		30	44	9.9	1.46	862.9901908		0.076037987	9.884698578	12.44812584	4.46913536	2.26048	6.7	0.20408	5.0	0.75	4.899996508	5.040149713	0.08033	4.5	0		1481	141	1205	88	1200	47	1197	55		1		1200.079681	58.29905008	1130.408687	2050.834129		320	33.08	668	417130.7803	1.34		22.19	0.13	1.65	4.34	1.15
E1101-293.7 L 153 12/3/2013 1:28:58 PM (Run: 1)		28	32	8.4	1.12	760.2394336		0.061603138	11.01685514	12.47106651	5.735499327	2.30970	7.7	0.20891	5.1	0.67	4.786774734	5.127966064	0.08019	5.7	-1.20794E-16		1208	129	1202	113	1215	55	1223	57		-2		1215.205617	60.81940069	1225.465574	2466.368469		205	22.17	590	505151.695	0.65	0.17	5.03	0.06	1.46	3.06	0.23
E1101-293.7 L 183 12/3/2013 2:34:07 PM (Run: 1)		47	33	12.8	0.71	1381.405816		0.078649214	10.09272114	12.49249751	3.075313948	2.23285	5.6	0.20231	4.7	0.84	4.943011432	4.674334023	0.08005	3.1	0		1530	149	1198	61	1191	39	1188	51		1		1191.445679	53.5446165	1152.761512	1489.601179		174	13.48	447	420785.0551	1.11		5.98	0.06	1.14	2.05	0.11
E1101-293.7 L 185 12/3/2013 2:37:31 PM (Run: 1)		247	2	54.8	0.01	3555268.364		0.073266465	21.46357146	12.52046674	1.842625351	2.25711	4.3	0.20496	3.9	0.91	4.878971067	3.926066887	0.07987	1.8	2.45547E-16		1429	296	1194	36	1199	31	1202	43		-1		1198.981302	45.51650381	1201.717702	44.01868261		63	1.60	375	418099.2411	4.02		0.12				0.06
E1101-293.7 L 190 12/3/2013 2:53:06 PM (Run: 1)		63	74	18.6	1.18	3042.523459		0.064407838	8.33320596	12.52761046	2.626242509	2.23849	5.0	0.20339	4.3	0.85	4.916744846	4.271500231	0.07982	2.6	4.75047E-16		1262	102	1193	52	1193	35	1193	47		0		1193.181771	49.18797395	1181.240393	1579.78025		224	36.72	1422	491079.4244	0.43	0.13	5.10	0.72	9.11	14.44	1.89
E1101-293.7 L 176 12/3/2013 2:18:37 PM (Run: 1)		46	98	18.2	2.11	1541.71886		0.08094131	8.519892696	12.57342219	3.985244559	2.24387	6.2	0.20462	4.7	0.77	4.887086713	4.738431613	0.07953	4.0	0		1573	129	1185	79	1195	43	1200	52		-1		1194.826916	54.98921543	1056.926535	3170.022694		263	25.34	883	399880.0893	1.04	0.04	25.59	0.15	3.46	8.69	2.11
E1101-293.7 L 150 12/3/2013 1:23:53 PM (Run: 1)		80	99	23.3	1.24	1491.778849		0.059140933	8.849971742	12.82357767	2.303617642	2.17173	4.8	0.20198	4.2	0.88	4.950925764	4.213631828	0.07798	2.3	3.6601E-16		1161	100	1146	46	1172	33	1186	46		-3		1171.917743	48.30242819	1190.671198	1423.877732		256	22.30	1293	502459.6343	1.75	0.05	8.20	0.40	5.63	9.72	0.76
E1101-293.7 L 175 12/3/2013 2:16:55 PM (Run: 1)		25	16	6.7	0.64	239.7342024		0.081234047	10.80480427	12.92508751	5.792030101	2.16022	7.4	0.20250	4.6	0.63	4.938211247	4.639499913	0.07737	5.8	0		1579	164	1131	115	1168	52	1189	50		-5		1168.172455	53.64299297	1153.183896	774.9877304		141	23.28	355	406953.1414	0.49		1.24	0.04	0.50	2.36	0.09
E1101-293.7 M 261 12/3/2013 5:29:19 PM (Run: 1)		67	51	18.1	0.77	892.3825913		0.071266224	9.193107579	13.13975622	4.658443511	2.11583	6.3	0.20164	4.3	0.68	4.959447836	4.27216097	0.07610	4.7	3.57028E-16		1391	124	1098	93	1154	44	1184	46		-8		1153.724293	49.19727344	1161.052007	561.6643791		140	7.67	1075	413009.8786	2.03		4.90	0.04	1.68	5.61	0.71
Experiment 3 - 3 December 2013
Isotope ratio and date errors include systematic calibration errors of 0.42% (207Pb/206Pb) and 5.08% (206Pb/238U) (2 sigma).
Trace element concentrations were deleted from analyses known to have intersected inclusions of non-zircon minerals based on P and Ti.
Ablation used a laser spot size of 30 microns, and a laser firing repetition rate of 10 Hz.
Activity of TiO2 for Ti-in-Zircon temperature calculation is 0.8.
[truncated: 38 more columns]
